# Supplementary material for: Re-usability of zeolites and modified clays for alkylation of cyclohexanol a contrast study
Source: Royal Society of Chemistry journal article supplement (doi:10.1039/c5ra09692h), 2015-01-01
Supplement: c5ra09692h1.pdf [file c5ra09692h1.pdf]

## Supplementary information

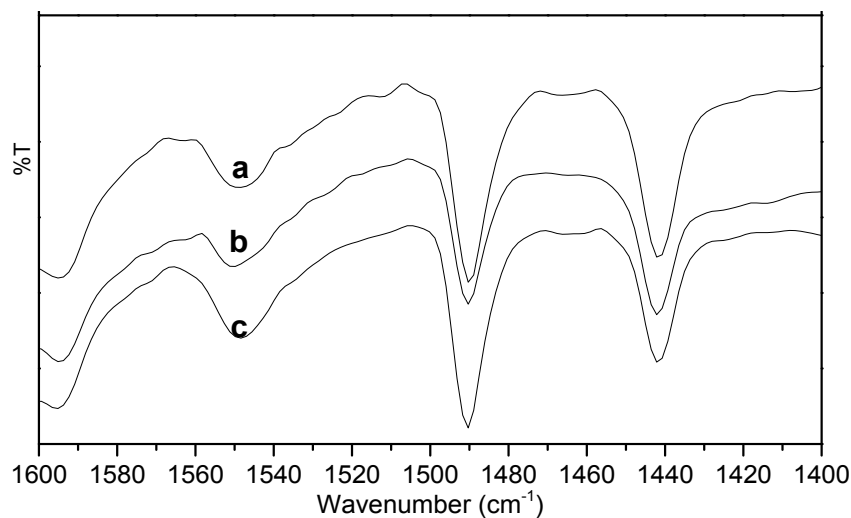

Fig Pyridine FT-IR spectra of (a) MSAclay (b) pTSAclay and (c) PDSAclay

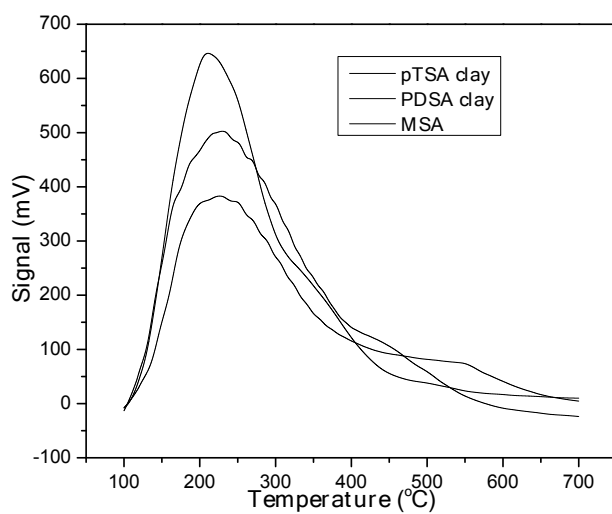

Fig  $\text{NH}_3$ -TPD signals of acid treated clay samples.

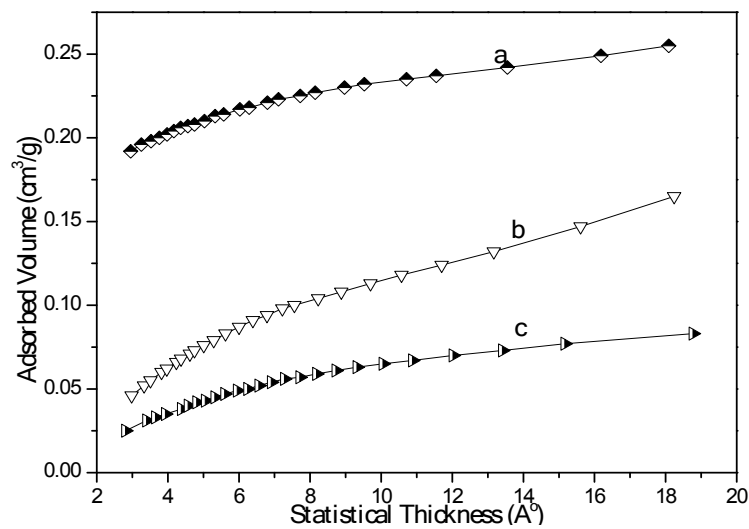

Fig t-plots of (a) pTSAclay (b) MSAclay and (c) PDSAclay.

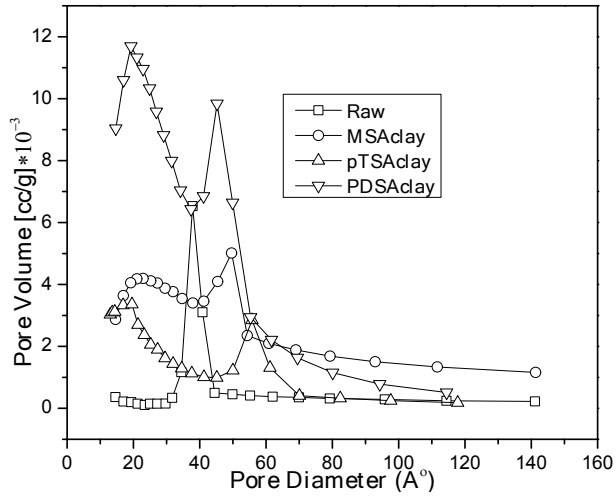

Fig BJH curves of (a) pTSAclay (b) MSAclay and (c) PDSAclay.

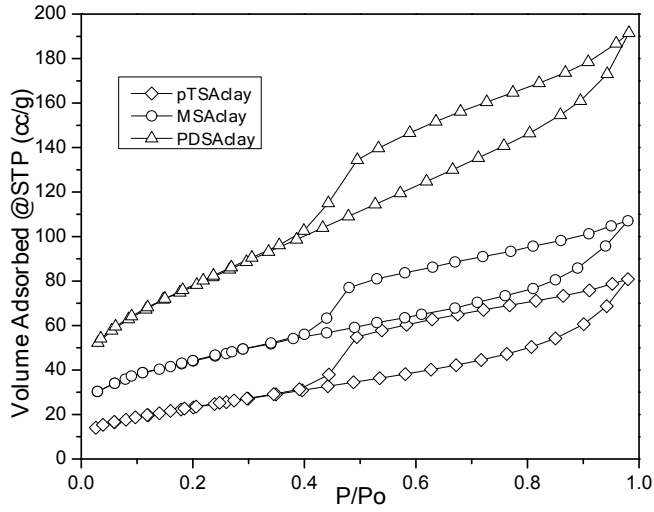

Fig Adsorption-desorption isotherm plots of pTSAclay, MSAclay and PDSAclay.

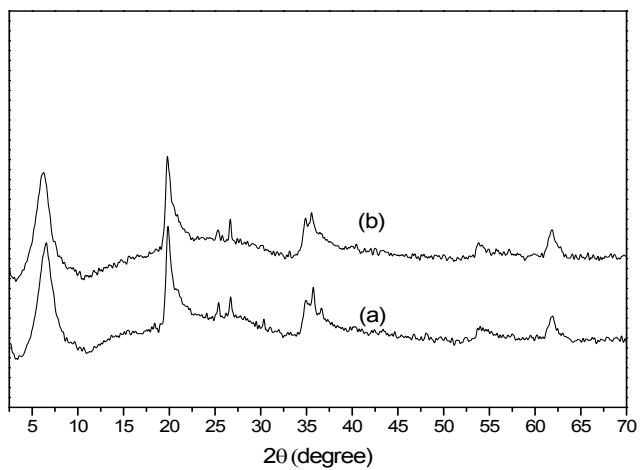

Fig XRD pattern of (a) 1PDSA and (b) used catalyst in the reaction.  
To show the there is no intercalation of reactant and product molecules in the clay samples.
